# Supplementary material for: Electroacupuncture for poststroke spasticity (EAPSS): protocol for a randomised controlled trial
Source: PubMed Central journal article supplement — BMJ Open. 2018 Feb 27;8(2):e017912. doi: 10.1136/bmjopen-2017-017912 (PMC5855476; doi:10.1136/bmjopen-2017-017912), 2018-02-27
Supplement: bmjopen-2017-017912supp004.pdf [file bmjopen-2017-017912supp004.pdf]

**Appendix 3 - Fugl-Meyer assessment of sensorimotor recovery after stroke (motor function)\***

| Motor Function Upper extremity   |                                                                    |                                                                                                                                                                                                                                                                                                                                                                              |       |
|----------------------------------|--------------------------------------------------------------------|------------------------------------------------------------------------------------------------------------------------------------------------------------------------------------------------------------------------------------------------------------------------------------------------------------------------------------------------------------------------------|-------|
| Test                             | ITEM                                                               | SCORING CRITERIA                                                                                                                                                                                                                                                                                                                                                             | SCORE |
| I. Reflexes                      | Biceps                                                             | 0-No reflex activity can be elicited<br>2-Reflex activity can be elicited                                                                                                                                                                                                                                                                                                    |       |
|                                  | Triceps                                                            |                                                                                                                                                                                                                                                                                                                                                                              |       |
| II. Flexor Synergy               | Elevation                                                          | 0-Cannot be performed at all<br>1-Performed partly<br>2-Performed faultlessly                                                                                                                                                                                                                                                                                                |       |
|                                  | Shoulder retraction                                                |                                                                                                                                                                                                                                                                                                                                                                              |       |
|                                  | Abduction (at least 90°)                                           |                                                                                                                                                                                                                                                                                                                                                                              |       |
|                                  | External rotation                                                  |                                                                                                                                                                                                                                                                                                                                                                              |       |
|                                  | Elbow flexion                                                      |                                                                                                                                                                                                                                                                                                                                                                              |       |
|                                  | Forearm supination                                                 |                                                                                                                                                                                                                                                                                                                                                                              |       |
| III. Extensor synergy            | Shoulder add./int. rot.                                            | 0-Cannot be performed at all<br>1-Performed partly<br>2-Performed faultlessly                                                                                                                                                                                                                                                                                                |       |
|                                  | Elbow extension                                                    |                                                                                                                                                                                                                                                                                                                                                                              |       |
|                                  | Forearm pronation                                                  |                                                                                                                                                                                                                                                                                                                                                                              |       |
| IV. Movement combining synergies | Hand to lumbar spine                                               | 0-No specific action performed<br>1-Hand must pass anterior superior iliac spine<br>2-Performed faultlessly                                                                                                                                                                                                                                                                  |       |
|                                  | Shoulder flexion to 90°, elbow at 0°                               | 0-Arm is immediately abducted, or elbow flexes at start of motion<br>1-Abduction or elbow flexion occurs in later phase of motion<br>2-Complete pronation and supination with correct positions at elbow and shoulder                                                                                                                                                        |       |
|                                  | Pronation/supination of forearm with elbow at 90° & shoulder at 0° | 0- Correct position of shoulder and elbow cannot be attained, and/or pronation or supination cannot be performed at all<br>1-Active pronation or supination can be performed even within a limited range of motion, and at the same time the shoulder and elbow are correctly positioned<br>2-Complete pronation and supination with correct positions at elbow and shoulder |       |
| V. Movement out of synergy       | Shoulder abduction to 90°, elbow at 0°, and forearm pronated       | 0-Initial elbow flexion occurs, or any deviation from pronated forearm occurs<br>1-Motion can be performed partly, or, if during motion, elbow is flexed, or forearm cannot be kept in pronation<br>2-Performed faultlessly                                                                                                                                                  |       |
|                                  | Shoulder flexion 90-180°, elbow at 0°, and forearm in mid-position | 0-Initial/flexion of elbow or shoulder abduction occurs<br>1-Elbow flexion or shoulder abduction occurs during shoulder flexion<br>2-Performed faultlessly                                                                                                                                                                                                                   |       |

|                            |                                                                                                                                                        |                                                                                                                                                                                                                                            |  |
|----------------------------|--------------------------------------------------------------------------------------------------------------------------------------------------------|--------------------------------------------------------------------------------------------------------------------------------------------------------------------------------------------------------------------------------------------|--|
|                            | Pronation/supination of forearm, elbow at 0° and shoulder between 30-90° of flexion                                                                    | 0-Supination and pronation cannot be performed at all, or elbow and shoulder positions cannot be attained<br>1-Elbow and shoulder properly positioned and pronation and supination performed in a limited range<br>2-Performed faultlessly |  |
| VI. Normal reflex activity | Biceps and/or finger flexors and triceps (This item is only included if the patient achieves a maximum score on all previous items, otherwise score 0) | 0-At least 2 of the 3 phasic reflexes are markedly hyperactive<br>1-One reflex is markedly hyperactive, or at least 2 reflexes are lively<br>2-No more than one reflex is lively and none are hyperactive                                  |  |
| VII. Wrist                 | Stability, elbow at 90°, shoulder at 0°                                                                                                                | 0-Patient cannot dorsiflex wrist to required 15°<br>1-Dorsiflexion is accomplished , but no resistance is taken<br>2-Position can be maintained with some (slight) resistance                                                              |  |
|                            | Flexion/extension, elbow at 90°, shoulder at 0°                                                                                                        | 0-Volitional movement does not occur<br>1-Patient cannot actively move the wrist joint throughout the total ROM<br>2-Faultless, smooth movement                                                                                            |  |
|                            | Stability, elbow at 0°, shoulder at 30°                                                                                                                | 0-Patient cannot dorsiflex wrist to required 15°<br>1-Dorsiflexion is accomplished , but no resistance is taken<br>2-Position can be maintained with some (slight) resistance                                                              |  |
|                            | Flexion/extension, elbow at 0°, shoulder at 30°                                                                                                        | 0-Volitional movement does not occur<br>1-Patient cannot actively move the wrist joint throughout the total ROM<br>2-Faultless, smooth movement                                                                                            |  |
|                            | Circumduction                                                                                                                                          | 0-Cannot be performed<br>1-Jerky motion or incomplete circumduction<br>2-Complete motion with smoothness                                                                                                                                   |  |
| VIII. Hand                 | Finger mass flexion                                                                                                                                    | 0-No flexion occurs<br>1-Some flexion, but not full motion<br>2-Complete active flexion (compared with unaffected hand)                                                                                                                    |  |
|                            | Finger mass extension                                                                                                                                  | 0-No flexion occurs<br>1-Patient can release an active mass flexion grasp<br>2-Full active extension                                                                                                                                       |  |
|                            | Grasp I - MCP joints extended and proximal & distal IP joints are flexed; grasp is tested against resistance                                           | 0-Required position cannot be acquired<br>1-Grasp is weak<br>2-Grasp can be maintained against relatively great resistance                                                                                                                 |  |

|                                                                                        |                                                                                                                                                                                                                        |                                                                                                                                                                                             |       |
|----------------------------------------------------------------------------------------|------------------------------------------------------------------------------------------------------------------------------------------------------------------------------------------------------------------------|---------------------------------------------------------------------------------------------------------------------------------------------------------------------------------------------|-------|
|                                                                                        | Grasp II - Patient is instructed to adduct thumb, with a scrap of paper inter-posed                                                                                                                                    | 0-Function cannot be performed<br>1-Scrap of paper interposed between the thumb and index finger can be kept in place, but not against a slight tug<br>2-Paper is held firmly against a tug |       |
|                                                                                        | Grasp III - Patient opposes thumb pad against the pad of index finger, with a pencil interposed                                                                                                                        | 0-Function cannot be performed<br>1-Pencil interposed between the thumb and index finger can be kept in place, but not against a slight tug<br>2-Pencil is held firmly against a tug        |       |
|                                                                                        | Grasp IV - The patient should grasp a can by opposing the volar surfaces of the 1st and 2nd digits.                                                                                                                    | 0-Function cannot be performed<br>1-A can interposed between the thumb and index finger can be kept in place, but not against a slight tug<br>2-Can is held firmly against a tug            |       |
|                                                                                        | Grasp V - The patient grasps a tennis ball with a spherical grip or is instructed to place his/her fingers in a position with abduction position of the thumb and abduction flexion of the 2nd, 3rd, 4th & 5th fingers | 0-Function cannot be performed<br>1-A tennis ball can be kept in place with a spherical grasp but not against a slight tug<br>2-Tennis ball is held firmly against a tug                    |       |
| IX.<br>Coordination/Speed-Finger from knee to nose (5 repetitions in rapid succession) | Tremor                                                                                                                                                                                                                 | 0-Marked tremor<br>1-Slight tremor<br>2-No tremor                                                                                                                                           |       |
|                                                                                        | Dysmetria                                                                                                                                                                                                              | 0-Pronounced or unsystematic dysmetria<br>1-Slight or systematic dysmetria<br>2-No dysmetria                                                                                                |       |
|                                                                                        | Speed                                                                                                                                                                                                                  | 0-Activity is more than 6 seconds longer than unaffected hand<br>1-(2-5.9)seconds longer than unaffected hand<br>2-Less than 2 seconds difference                                           |       |
| Upper Extremity Total                                                                  |                                                                                                                                                                                                                        | Maximum = 66                                                                                                                                                                                |       |
| Motor Function - Lower Extremity                                                       |                                                                                                                                                                                                                        |                                                                                                                                                                                             |       |
| TEST                                                                                   | ITEM                                                                                                                                                                                                                   | SCORING CRITERIA                                                                                                                                                                            | SCORE |
| I. Reflex Activity                                                                     | Achilles                                                                                                                                                                                                               | 0-No reflex activity can be elicited                                                                                                                                                        |       |
|                                                                                        | Patellar                                                                                                                                                                                                               | 2-Reflex activity can be elicited                                                                                                                                                           |       |
| II. A. Flexor Synergy (in supine)                                                      | Hip flexion                                                                                                                                                                                                            | 0-Cannot be performed at all                                                                                                                                                                |       |
|                                                                                        | Knee flexion                                                                                                                                                                                                           | 1-Partial motion                                                                                                                                                                            |       |
|                                                                                        | Ankle dorsiflexion                                                                                                                                                                                                     | 2-Full motion                                                                                                                                                                               |       |
| II. B. Extensor Synergy (in side lying)                                                | Hip extension                                                                                                                                                                                                          | 0-Cannot be performed at all                                                                                                                                                                |       |
|                                                                                        | Adduction                                                                                                                                                                                                              | 1-Partial motion                                                                                                                                                                            |       |
|                                                                                        | Knee flexion                                                                                                                                                                                                           | 2-Full motion                                                                                                                                                                               |       |
|                                                                                        | Ankle plantar flexion                                                                                                                                                                                                  |                                                                                                                                                                                             |       |

|                                                                                             |                                                                                                                                                       |                                                                                                                                                                                                           |  |
|---------------------------------------------------------------------------------------------|-------------------------------------------------------------------------------------------------------------------------------------------------------|-----------------------------------------------------------------------------------------------------------------------------------------------------------------------------------------------------------|--|
| III. Movement combining synergies (sitting: knees free of chair)                            | A. Knee flexion beyond 90°                                                                                                                            | 0-No active motion<br>1-From slightly extended position, knee can be flexed, but not beyond 90°<br>2-Knee flexion beyond 90°                                                                              |  |
|                                                                                             | B. Ankle dorsiflexion                                                                                                                                 | 0-No active flexion<br>1-Incomplete active flexion<br>2-Normal dorsiflexion                                                                                                                               |  |
| IV. Movement out of synergy (standing, hip at 0°)                                           | A. Knee flexion                                                                                                                                       | 0-Knee cannot flex without hip flexion<br>1-Knee begins flexion without hip flexion, but does not reach to 90°, or hip flexes during motion<br>2-Full motion as described                                 |  |
|                                                                                             | B. Ankle dorsiflexion                                                                                                                                 | 0-No active motion<br>1-Partial motion<br>2-Full motion                                                                                                                                                   |  |
| V. Normal Reflexes (sitting)                                                                | Knee flexors<br>Patellar<br>Achilles<br>(This item is only included if the patient achieves a maximum score on all previous items, otherwise score 0) | 0-At least 2 of the 3 phasic reflexes are markedly hyperactive<br>1-One reflex is markedly hyperactive, or at least 2 reflexes are lively<br>2-No more than one reflex is lively and none are hyperactive |  |
| VI. Coordination/speed - Sitting: Heel to opposite knee (5 repetitions in rapid succession) | A. Tremor                                                                                                                                             | 0-Marked tremor<br>1-Slight tremor<br>2-No tremor                                                                                                                                                         |  |
|                                                                                             | B. Dysmetria                                                                                                                                          | 0-Pronounced or unsystematic dysmetria<br>1-Slight or systematic dysmetria<br>2-No dysmetria                                                                                                              |  |
|                                                                                             | C. Speed                                                                                                                                              | 0-Activity is more than 6 seconds longer than unaffected side<br>1-(2-5.9) seconds longer than unaffected side<br>2-Less than 2 seconds difference                                                        |  |
| Lower Extremity Total                                                                       |                                                                                                                                                       | Max = 34                                                                                                                                                                                                  |  |
| Total Motor Score (UE+LE)                                                                   |                                                                                                                                                       | Max = 100                                                                                                                                                                                                 |  |

\*Sullivan KJ, Tilson JK, Cen SY, et al. Fugl-Meyer assessment of sensorimotor function after stroke: standardized training procedure for clinical practice and clinical trials. *Stroke*, 2011. **42**(2): p. 427-32.
