# Supplementary material for: Electroacupuncture for poststroke spasticity (EAPSS): protocol for a randomised controlled trial
Source: PubMed Central journal article supplement — BMJ Open. 2018 Feb 27;8(2):e017912. doi: 10.1136/bmjopen-2017-017912 (PMC5855476; doi:10.1136/bmjopen-2017-017912), 2018-02-27
Supplement: bmjopen-2017-017912supp006.pdf [file bmjopen-2017-017912supp006.pdf]

| 日期               | 批号           | 修改                                   | 相关文件                              |
|------------------|--------------|--------------------------------------|-----------------------------------|
| 2016 年 10 月 28 日 | B2016-204-01 | /                                    | /                                 |
| 2016 年 12 月 8 日  | B2016-204-02 | 在知情同意书中增加交通补贴的内容                     | 1) 知情同意书                          |
| 2017 年 2 月 27 日  | B2016-204-03 | 纳入标准之一“卒中后 30 天以后”修改为“卒中后 30 天至 1 年” | 1) 研究方案;<br>2) 招募海报和通知            |
| 2017 年 8 月 18 日  | B2016-204-04 | 次要结局指标之一“功能独立性评分”修改为“巴氏指数”           | 1) 研究方案;<br>2) 病例报告表;<br>3) 研究者手册 |

## 广东省中医院伦理委员会

Ethics Committee of Guangdong Provincial Hospital of Chinese Medicine

## 伦理审查批件

## Approval Notice

批件号：广东省中医院伦理委员会 B2016-204-01

|                     |                                                                                                                                                                                                                                                                         |                  |                         |
|---------------------|-------------------------------------------------------------------------------------------------------------------------------------------------------------------------------------------------------------------------------------------------------------------------|------------------|-------------------------|
| 审查会议日期              | 2016 年 10 月 28 日                                                                                                                                                                                                                                                        |                  |                         |
| 审查会议地点              | 广东省中医院研修楼 20 楼长形会议室                                                                                                                                                                                                                                                     |                  |                         |
| 临床研究批文              | --                                                                                                                                                                                                                                                                      |                  |                         |
| 临床研究项目              | 电针治疗卒中后痉挛的实用性随机对照试验                                                                                                                                                                                                                                                     |                  |                         |
| 审查文件                | 1.伦理审查申请表 2.研究经济利益声明<br>3.研究方案（版本号：1.0，2016 年 9 月 20 日）<br>4.病例报告表、电针治疗记录表、筛查问卷、信息调查表（版本号均为 1.0，2016 年 9 月 20 日）<br>5.研究者手册（版本号：1.0，2016 年 9 月 20 日）<br>6.专业组人员名单，主要研究者简历<br>7.招募受试者的材料（版本号：1.0，2016 年 9 月 20 日）<br>8.向受试者提供的知情同意书（包括告知页和签字页）（版本号：1.0，2016 年 9 月 20 日）  |                  |                         |
| 申办者                 | 广东省中医院                                                                                                                                                                                                                                                                  |                  |                         |
| 临床研究单位              | 广东省中医院，澳大利亚皇家墨尔本理工大学                                                                                                                                                                                                                                                    |                  |                         |
| 主要研究者               | 温泽淮                                                                                                                                                                                                                                                                     |                  |                         |
| 伦理审查方式              | 会议审查                                                                                                                                                                                                                                                                    |                  |                         |
| 参会委员                | 刘军，曾星，刘旭生，李艳，罗懿妮，陈伯健，李泳，李立凯                                                                                                                                                                                                                                             |                  |                         |
| 审查意见                | 根据国家食品药品监督管理局《药物临床试验质量管理规范》、《药物临床试验伦理审查工作指导原则》，卫生部《涉及人的生物医学研究伦理审查办法》，国家中医药管理局《中医药临床研究伦理审查平台建设规范》，以及世界医学会《赫尔辛基宣言》和国际医学科学组织委员会《人体生物医学研究国际道德指南》的伦理原则，经本伦理委员会审查，同意按照上述临床研究方案和上述已通过审查的文件进行电针治疗卒中后痉挛的实用性随机对照试验。                                                               |                  |                         |
| 伦理委员会声明             | 本批件将在各中心机构及其伦理委员会备案。如果对方案在本机构的可行性（包括研究者的资格与经验、设备与条件等）有不同意见，请及时与本伦理委员会联系。<br>如项目暂停/提前终止/完成临床研究，请及时通知伦理委员会。如发生严重不良事件以及影响研究风险受益比的非预期不良事件，应及时报告本伦理委员会。如临床研究方案、知情同意书的任何修改，主要研究者更换，应及时通知伦理委员会，重新审查，获得批准后执行。发现影响受试者参加研究意愿的违反方案情况应及时报告。请在本批件失效日期前 1 个月提交研究进度/结题报告，以便对该项目进行跟踪审查。 |                  |                         |
| 批件有效期               | 自 2016 年 10 月 28 日起<br>至 2018 年 10 月 28 日止                                                                                                                                                                                                                              | 跟踪审查频率<br>预计审查日期 | 1 年<br>2017 年 10 月 28 日 |
| 联系电话                | 020-81887233 转 35943，联系人：李晓彦                                                                                                                                                                                                                                            |                  |                         |
| 主任/副主任委员签字          | 刘军                                                                                                                                                                                                                                                                      |                  |                         |
| 广东省中医院伦理委员会（盖章）     |                                                                                                                                                                                                                                                                         |                  |                         |
| 日期：2016 年 10 月 28 日 |                                                                                                                                                                                                                                                                         |                  |                         |

广东省中医院伦理委员会  
Ethics Committee of Guangdong Provincial Hospital of Chinese Medicine  
伦理审查批件  
Approval Notice

批件号：广东省中医院伦理委员会 B2016-204-02

|                    |                                                                                                                                                                                                                                                                                                                           |                  |                         |
|--------------------|---------------------------------------------------------------------------------------------------------------------------------------------------------------------------------------------------------------------------------------------------------------------------------------------------------------------------|------------------|-------------------------|
| 审查会议日期             | --                                                                                                                                                                                                                                                                                                                        |                  |                         |
| 审查会议地点             | --                                                                                                                                                                                                                                                                                                                        |                  |                         |
| 临床研究批文             | --                                                                                                                                                                                                                                                                                                                        |                  |                         |
| 临床研究项目             | 电针治疗卒中后痉挛的实用性随机对照试验                                                                                                                                                                                                                                                                                                       |                  |                         |
| 审查文件               | 1. 修正方案申请报告<br>2. 向受试者提供的知情同意书（包括告知页和签字页）（版本号：2.0，2016年12月5日）                                                                                                                                                                                                                                                             |                  |                         |
| 申办者/任务下达单位         | 广东省中医院                                                                                                                                                                                                                                                                                                                    |                  |                         |
| 临床研究单位             | 广东省中医院，澳大利亚皇家墨尔本理工大学                                                                                                                                                                                                                                                                                                      |                  |                         |
| 主要研究者              | 温泽淮                                                                                                                                                                                                                                                                                                                       |                  |                         |
| 伦理审查方式             | 快速审查                                                                                                                                                                                                                                                                                                                      |                  |                         |
| 审查委员               | 李艳                                                                                                                                                                                                                                                                                                                        |                  |                         |
| 审查意见               | <p>根据国家食品药品监督管理局《药物临床试验质量管理规范》、《药物临床试验伦理审查工作指导原则》，卫计委《涉及人的生物医学研究伦理审查办法》、《干细胞临床研究管理办法（试行）》，国家中医药管理局《中医药临床研究伦理审查平台建设规范》，以及世界医学会《赫尔辛基宣言》和国际医学科学组织委员会《人体生物医学研究国际道德指南》的伦理原则，经本伦理委员会审查，同意按照上述临床研究方案和上述已通过审查的文件进行电针治疗卒中后痉挛的实用性随机对照试验。</p>                                                                                        |                  |                         |
| 伦理委员会声明            | <p>本批件将在各中心机构及其伦理委员会备案。如果对方案在本机构的可行性（包括研究者的资格与经验、设备与条件等）有不同意见，请及时与本伦理委员会联系。</p> <p>如项目暂停/提前终止/完成临床研究，或发生严重不良事件以及影响研究风险受益比的非预期不良事件，请及时报告伦理委员会。如临床研究方案、知情同意书的任何修改，主要研究者更换，应及时通知伦理委员会，经审查批准后执行。发现影响受试者参加研究意愿的违反方案情况应及时报告。请在本批件失效日期前1个月提交研究进度/结题报告，以便对该项目进行跟踪审查。</p> <p>凡涉及中国人类遗传资源、需要报批的研究项目，须在获得中国人类遗传资源管理办公室批准后才能开始研究。</p> |                  |                         |
| 批件有效期              | 自 2016 年 10 月 28 日起<br>至 2018 年 10 月 28 日止                                                                                                                                                                                                                                                                                | 跟踪审查频率<br>预计审查日期 | 1 年<br>2017 年 10 月 28 日 |
| 联系电话               | 020-81887233 转 35943，联系人：李晓彦                                                                                                                                                                                                                                                                                              |                  |                         |
| 主任/副主任委员签字         | 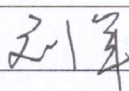                                                                                                                                                                                                                                       |                  |                         |
| 广东省中医院伦理委员会（盖章）    |                                                                                                                                                                                                                                                                                                                           |                  |                         |
| 日期：2016 年 12 月 8 日 |                                                                                                                                                                                                                                                                                                                           |                  |                         |

**广东省中医院伦理委员会**  
**Ethics Committee of Guangdong Provincial Hospital of Chinese Medicine**  
**伦理审查批件**  
**Approval Notice**

批件号：广东省中医院伦理委员会 B2016-204-03

|                                                                                                                                |                                                                                                                                                                                                                                                                                                                             |                  |                         |
|--------------------------------------------------------------------------------------------------------------------------------|-----------------------------------------------------------------------------------------------------------------------------------------------------------------------------------------------------------------------------------------------------------------------------------------------------------------------------|------------------|-------------------------|
| 审查日期                                                                                                                           | 2017 年 2 月 27 日                                                                                                                                                                                                                                                                                                             |                  |                         |
| 审查地点                                                                                                                           | --                                                                                                                                                                                                                                                                                                                          |                  |                         |
| 临床研究批文                                                                                                                         | --                                                                                                                                                                                                                                                                                                                          |                  |                         |
| 临床研究项目                                                                                                                         | 电针治疗卒中后痉挛的实用性随机对照试验                                                                                                                                                                                                                                                                                                         |                  |                         |
| 审查文件                                                                                                                           | 1.修正方案申请报告<br>2.研究方案（版本号：2.0，2017 年 2 月 22 日）<br>3.招募受试者材料 1（版本号：2.0，2017 年 2 月 22 日）、招募受试者材料 2                                                                                                                                                                                                                             |                  |                         |
| 申办者/任务下达单位                                                                                                                     | 广东省中医院                                                                                                                                                                                                                                                                                                                      |                  |                         |
| 临床研究单位                                                                                                                         | 广东省中医院，澳大利亚皇家墨尔本理工大学                                                                                                                                                                                                                                                                                                        |                  |                         |
| 主要研究者                                                                                                                          | 温泽淮                                                                                                                                                                                                                                                                                                                         |                  |                         |
| 伦理审查方式                                                                                                                         | 快速审查                                                                                                                                                                                                                                                                                                                        |                  |                         |
| 审查委员                                                                                                                           | 李艳                                                                                                                                                                                                                                                                                                                          |                  |                         |
| 审查意见                                                                                                                           | <p>根据国家食品药品监督管理局《药物临床试验质量管理规范》、《药物临床试验伦理审查工作指导原则》，卫计委《涉及人的生物医学研究伦理审查办法》、《干细胞临床研究管理办法（试行）》，国家中医药管理局《中医药临床研究伦理审查平台建设规范》，以及世界医学会《赫尔辛基宣言》和国际医学科学组织委员会《人体生物医学研究国际道德指南》的伦理原则，经本伦理委员会审查，同意按照上述临床研究方案和上述已通过审查的文件进行电针治疗卒中后痉挛的实用性随机对照试验。</p>                                                                                          |                  |                         |
| 伦理委员会声明                                                                                                                        | <p>本批件将在各中心机构及其伦理委员会备案。如果对方案在本机构的可行性（包括研究者的资格与经验、设备与条件等）有不同意见，请及时与本伦理委员会联系。</p> <p>如项目暂停/提前终止/完成临床研究，或发生严重不良事件以及影响研究风险受益比的非预期不良事件，请及时报告伦理委员会。如临床研究方案、知情同意书的任何修改，主要研究者更换，应及时通知伦理委员会，经审查批准后执行。发现影响受试者参加研究意愿的违反方案情况应及时报告。请在本批件失效日期前 1 个月提交研究进度/结题报告，以便对该项目进行跟踪审查。</p> <p>凡涉及中国人类遗传资源、需要报批的研究项目，须在获得中国人类遗传资源管理办公室批准后才能开始研究。</p> |                  |                         |
| 批件有效期                                                                                                                          | 自 2016 年 10 月 28 日起<br>至 2018 年 10 月 28 日止                                                                                                                                                                                                                                                                                  | 跟踪审查频率<br>预计审查日期 | 1 年<br>2017 年 10 月 28 日 |
| 联系电话                                                                                                                           | 020-81887233 转 35943，联系人：李晓彦                                                                                                                                                                                                                                                                                                |                  |                         |
| 主任/副主任委员签字                                                                                                                     | 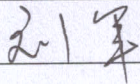                                                                                                                                                                                                                                         |                  |                         |
| 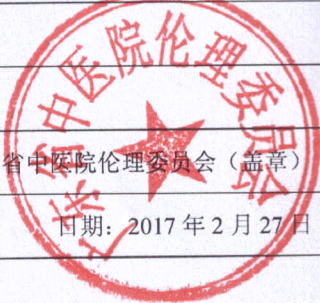<br>广东省中医院伦理委员会（盖章）<br>日期：2017 年 2 月 27 日 |                                                                                                                                                                                                                                                                                                                             |                  |                         |

**广东省中医院伦理委员会**  
**Ethics Committee of Guangdong Provincial Hospital of Chinese Medicine**  
**伦理审查批件**  
**Approval Notice**

批件号：广东省中医院伦理委员会 B2016-204-04

|                    |                                                                                                                                                                                                                                                                                                                             |                  |                         |
|--------------------|-----------------------------------------------------------------------------------------------------------------------------------------------------------------------------------------------------------------------------------------------------------------------------------------------------------------------------|------------------|-------------------------|
| 审查日期               | 2017 年 8 月 18 日                                                                                                                                                                                                                                                                                                             |                  |                         |
| 审查地点               | --                                                                                                                                                                                                                                                                                                                          |                  |                         |
| 临床研究批文             | --                                                                                                                                                                                                                                                                                                                          |                  |                         |
| 临床研究项目             | 电针治疗卒中后痉挛的实用性随机对照试验                                                                                                                                                                                                                                                                                                         |                  |                         |
| 审查文件               | 1.修正方案申请报告<br>2.研究方案（版本号：3.0，2017 年 8 月 16 日）<br>3.病例报告表（版本号：3.0，2017 年 8 月 16 日）<br>4.研究者手册（版本号：2.0，2017 年 8 月 16 日）                                                                                                                                                                                                       |                  |                         |
| 申办者/任务下达单位         | 广东省中医院                                                                                                                                                                                                                                                                                                                      |                  |                         |
| 临床研究单位             | 广东省中医院，澳大利亚皇家墨尔本理工大学                                                                                                                                                                                                                                                                                                        |                  |                         |
| 主要研究者              | 温泽淮                                                                                                                                                                                                                                                                                                                         |                  |                         |
| 伦理审查方式             | 快速审查                                                                                                                                                                                                                                                                                                                        |                  |                         |
| 审查委员               | 罗懿妮                                                                                                                                                                                                                                                                                                                         |                  |                         |
| 审查意见               | <p>根据国家食品药品监督管理局《药物临床试验质量管理规范》、《药物临床试验伦理审查工作指导原则》，卫计委《涉及人的生物医学研究伦理审查办法》、《干细胞临床研究管理办法（试行）》，国家中医药管理局《中医药临床研究伦理审查平台建设规范》，以及世界医学会《赫尔辛基宣言》和国际医学科学组织委员会《人体生物医学研究国际道德指南》的伦理原则，经本伦理委员会审查，同意按照上述临床研究方案和上述已通过审查的文件进行电针治疗卒中后痉挛的实用性随机对照试验。</p>                                                                                          |                  |                         |
| 伦理委员会声明            | <p>本批件将在各中心机构及其伦理委员会备案。如果对方案在本机构的可行性（包括研究者的资格与经验、设备与条件等）有不同意见，请及时与本伦理委员会联系。</p> <p>如项目暂停/提前终止/完成临床研究，或发生严重不良事件以及影响研究风险受益比的非预期不良事件，请及时报告伦理委员会。如临床研究方案、知情同意书的任何修改，主要研究者更换，应及时通知伦理委员会，经审查批准后执行。发现影响受试者参加研究意愿的违反方案情况应及时报告。请在本批件失效日期前 1 个月提交研究进度/结题报告，以便对该项目进行跟踪审查。</p> <p>凡涉及中国人类遗传资源、需要报批的研究项目，须在获得中国人类遗传资源管理办公室批准后才能开始研究。</p> |                  |                         |
| 批件有效期              | 自 2016 年 10 月 28 日起<br>至 2018 年 10 月 28 日止                                                                                                                                                                                                                                                                                  | 跟踪审查频率<br>预计审查日期 | 1 年<br>2017 年 10 月 28 日 |
| 联系电话               | 020-81887233 转 35943，联系人：李晓彦                                                                                                                                                                                                                                                                                                |                  |                         |
| 主任/副主任委员签字         | 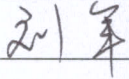                                                                                                                                                                                                                                         |                  |                         |
| 广东省中医院伦理委员会（盖章）    |                                                                                                                                                                                                                                                                                                                             |                  |                         |
| 日期：2017 年 8 月 18 日 |                                                                                                                                                                                                                                                                                                                             |                  |                         |
