# Supplementary material for: Electroacupuncture for poststroke spasticity (EAPSS): protocol for a randomised controlled trial
Source: PubMed Central journal article supplement — BMJ Open. 2018 Feb 27;8(2):e017912. doi: 10.1136/bmjopen-2017-017912 (PMC5855476; doi:10.1136/bmjopen-2017-017912), 2018-02-27
Supplement: bmjopen-2017-017912supp008.pdf [file bmjopen-2017-017912supp008.pdf]

Human Research Ethics Committee (HREC)  
Research and Innovation office  
NH&MRC Code: EC00237

**Notice of RMIT Registration  
Of an Approved External Human Research Ethics Application**

Date: **7 December 2016**

Approval number (principal HREC): **B2016-204-0**

Approving HREC: **Ethics Committee of Guangdong Provincial Hospital of Chinese Medicine**

RMIT Reference number (RM): **20542**

Project title: ***Electro-acupuncture for post-stroke Spasticity: a pilot randomized controlled trial***

Risk classification: **More than low risk**

Chief investigator and institution: **Prof Zehuai Wen, Guangdong Provincial Hospital of Chinese Medicine**

RMIT Personnel: **Miss Yiyi Cai, PhD Candidate  
Dr Claire Shuiqing Zhang, Research Fellow**

Registration: From: **28 October 2016** To: **28 October 2018**

Terms of Registration:

**1. Responsibilities of RMIT personnel**

It is the responsibility of the chief investigator to ensure that all other investigators and staff on a project are aware of the terms of approval and to ensure that the project is conducted as approved by the external HREC and according to the terms of registration at RMIT. RMIT registration is only valid whilst RMIT personnel hold a position at RMIT University.

**2. Amendments**

Amendments to an approved application are sought according to the processes used by the external HREC. After approval for an amendment is received relevant documentation (copy of amendment and approval notice, etc) must be provided to the RMIT HREC.

**3. Adverse events**

You should notify the RMIT HREC immediately of any adverse events that are reported to the external HREC.

**4. Complaints**

Any complaints that are received regarding this project must be reported to the external HREC and also reported to the RMIT HREC.

**5. Special conditions of approval**

Nil.

In any future correspondence please quote the RMIT reference number and project title above.

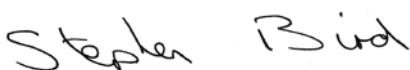

Prof Stephen Bird  
Chairperson  
RMIT HREC

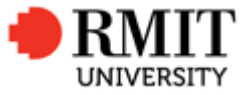

Human Research Ethics Committee (HREC)  
Research and Innovation office  
NH&MRC Code: EC00237

cc: Dr Peter Burke, HREC secretary  
Dr Clarie Zhang, Research Fellow  
Miss Yiyi Cai, PhD Candidate
